# Supplementary material for: Application of Kolcaba’s Comfort Theory in healthcare promoting adults’ comfort: a scoping review
Source: HighWire-hosted journal article supplement (doi:10.1136/bmjopen-2023-077810), 2024-10-01
Supplement: bmjopen-2023-077810supp006_data_supplement.pdf [file bmjopen-2023-077810supp006_data_supplement.pdf]

Supplemental Table S6. Seven categories of Comfort Theory application in healthcare (n = 359)

| Theory application category                                              | N  | Year of publication                          | Country of origin                                                                                                             | Settings                                                    | Participants                                                                                                                                                                                                                                                                                                                                                                                                                                                                                  | Design/ methods                                                        |
|--------------------------------------------------------------------------|----|----------------------------------------------|-------------------------------------------------------------------------------------------------------------------------------|-------------------------------------------------------------|-----------------------------------------------------------------------------------------------------------------------------------------------------------------------------------------------------------------------------------------------------------------------------------------------------------------------------------------------------------------------------------------------------------------------------------------------------------------------------------------------|------------------------------------------------------------------------|
| Interventions underpinned by Comfort Theory as the theoretical framework | 56 | 2018 - 2023: n = 25,<br>1992 - 2017: n = 31. | USA: n = 24,<br>China: n = 20,<br>Turkey: n = 6,<br>Portugal: n = 3,<br>Indonesia: n = 2,<br>Canada: n = 1.                   | Hospital: n= 45,<br>Others: n = 11                          | Genitourinary system diseases: n = 9, Neoplasms: n = 8, Digestive system diseases: n = 6, Surgical or post-surgical status: n = 6, Palliative care: n = 6, Pregnancy, childbirth or the puerperium: n = 4, Nervous system diseases: n = 3, Critical care patients: n = 3, Healthy people: n = 3, Circulatory system diseases: n = 2, Mental, behavioural or neurodevelopmental disorders: n = 2, Patients with pain: n = 2, Respiratory system diseases: n = 1, Chemotherapy patients: n = 1. | Quasi-experimental study: n = 29, RCT: n = 18, MMS: n = 9.             |
| Interventions evaluated by instruments derived from Comfort Theory       | 96 | 2018 - 2022: n = 61,<br>1992 - 2017: n = 35. | China: n = 72,<br>Turkey: n = 16,<br>Iran: n = 4,<br>USA: n = 1,<br>Australia: n = 1,<br>Thailand: n = 1,<br>Malaysia: n = 1. | Hospital: n = 93,<br>Nursing home: n = 2,<br>School: n = 1. | Neoplasms: n = 21, Circulatory system diseases: n = 16, Pregnancy, childbirth or the puerperium: n = 10, Digestive system diseases: n = 8, Genitourinary system diseases: n = 7, Musculoskeletal system or connective tissue diseases: n = 6, Surgical or post-surgical status: n = 6, Respiratory system diseases: n = 4, Injury, poisoning or certain other consequences of external causes: n = 4, Bedridden patients: n = 3,                                                              | RCT: n = 65, Quasi-experimental study: n = 29, MMS: n = 1, CSS: n = 1. |

| Theory application category                                                                 | N  | Year of publication                          | Country of origin                                                                                          | Settings                             | Participants                                                                                                                                                                                                                                                                                                                                                                                                                                                                                                                                                                                                                                                                                                                                                                                                                                 | Design/ methods                                                                                                                      |
|---------------------------------------------------------------------------------------------|----|----------------------------------------------|------------------------------------------------------------------------------------------------------------|--------------------------------------|----------------------------------------------------------------------------------------------------------------------------------------------------------------------------------------------------------------------------------------------------------------------------------------------------------------------------------------------------------------------------------------------------------------------------------------------------------------------------------------------------------------------------------------------------------------------------------------------------------------------------------------------------------------------------------------------------------------------------------------------------------------------------------------------------------------------------------------------|--------------------------------------------------------------------------------------------------------------------------------------|
| Descriptive or observational studies of services or practices underpinned by Comfort Theory | 34 | 2018 - 2023: n = 15,<br>1992 - 2017: n = 19  | USA: n = 19,<br>China: n = 10,<br>Pakistan: n = 2,<br>Brazil: n = 1,<br>Chile: n = 1,<br>Singapore: n = 1. | Hospital: n = 23,<br>Others: n = 2.  | Nervous system diseases: n = 2,<br>Elders: n = 2, Endocrine, nutritional or metabolic diseases: n = 2, Mental, behavioural or neurodevelopmental disorders: n = 1, Certain infectious or parasitic diseases: n = 1, Ear or mastoid process diseases: n = 1, Faecal incontinence patients: n =1, Unspecified inpatients: n = 2.<br>Neoplasms: n = 8, Healthy people: n = 6, Circulatory system disease: n = 3, Palliative care: n = 3,Respiratory system diseases: n = 2, Elders: n = 2, Pregnancy, childbirth or the puerperium: n = 2, Surgical or post-surgical status: n = 2, Genitourinary system diseases: n = 1,<br>Neurocognitive disorders patients: n = 1, Injury, poisoning or certain other consequences of external causes: n = 1, Critical care: n = 1, Post traumatic loss of limb patients: n = 1, Patients with pain: n = 1. | Case study: n = 13,<br>Service description: n = 10, CCS: n = 6,<br>Quasi-experimental study: n = 2, MMS: n = 2, Cohort study: n = 1. |
| Surveys using questionnaires derived from Comfort Theory                                    | 71 | 2018 - 2023: n = 29,<br>1992 - 2017: n = 42. | China: n = 29,<br>USA: n = 15,<br>Turkey: n = 12,<br>Brazil: n = 7,                                        | Hospital: n = 56,<br>Others: n = 15. | Neoplasms: n = 12, Genitourinary system diseases: n = 8, Pregnancy, childbirth or the puerperium: n = 7, Healthy people: n = 7, Surgical or                                                                                                                                                                                                                                                                                                                                                                                                                                                                                                                                                                                                                                                                                                  | CSS: n = 51 (in which online survey: n = 5),<br>Longitudinal study: n = 16, MMS: n = 3,                                              |

| Theory application category                                    | N  | Year of publication                          | Country of origin                                                                                                                                        | Settings                            | Participants                                                                                                                                                                                                                                                                                                                                                                                                                                                         | Design/ methods                                                                                                                                                                                                                                          |
|----------------------------------------------------------------|----|----------------------------------------------|----------------------------------------------------------------------------------------------------------------------------------------------------------|-------------------------------------|----------------------------------------------------------------------------------------------------------------------------------------------------------------------------------------------------------------------------------------------------------------------------------------------------------------------------------------------------------------------------------------------------------------------------------------------------------------------|----------------------------------------------------------------------------------------------------------------------------------------------------------------------------------------------------------------------------------------------------------|
|                                                                |    |                                              | Korea: n = 2,<br>Austria + Germany: n = 1,<br>Colombia: n = 1,<br>Jordan: n = 1,<br>Iran: n = 1,<br>Israel: n = 1,<br>Thailand: n = 1.                   |                                     | post-surgical status: n = 6, Digestive system diseases: n = 5, Palliative care: n = 5, Circulatory system diseases: n = 4, Nervous system diseases: n = 3, Critical care: n = 3, Elder patients and nurses: n = 3, Urinary incontinence patients: n = 2, Respiratory system diseases: n = 2, Injury, poisoning or certain other consequences of external causes: n = 1, Certain infectious or parasitic diseases: n = 1, Multiple system: n = 1, Unspecified: n = 1. | Cohort study: n = 1.                                                                                                                                                                                                                                     |
| Questionnaires development or adaption based on Comfort Theory | 34 | 2018 - 2023: n = 15,<br>1992 - 2017: n = 19. | China: n = 12,<br>Austria + Germany: n = 4,<br>Brazil: n = 4,<br>Portugal: n = 4,<br>Turkey: n = 4,<br>USA: n = 3,<br>Spain: n = 2,<br>Indonesia: n = 1. | Hospital: n = 28,<br>Others: n = 6. | Neoplasms: n = 5, Genitourinary system diseases: n = 5, Healthy people: n = 5, Diseases of the musculoskeletal system or connective tissue: n = 4, Surgical or post-surgical status patients: n = 4, Nervous system disease: n = 3, Circulatory system diseases: n = 2, Palliative care: n = 2, Mental, behavioural or neurodevelopmental disorders: n = 1, Pregnancy, childbirth or the puerperium: n = 1, Unspecified participants: n = 2.                         | Questionnaire development: n = 15, Questionnaire cross-cultural adaption: n = 8, Questionnaire psychometric test (reliability and validity): n = 7, Questionnaire revalidation in populations: n = 2, Questionnaire validation feasibility study: n = 2. |

| Theory application category                                | N  | Year of publication                          | Country of origin                                                                                                                                                                                       | Settings                            | Participants                                                                                                                                                                                                                                                                                      | Design/ methods                                                                                                                                                                                                                                                                 |
|------------------------------------------------------------|----|----------------------------------------------|---------------------------------------------------------------------------------------------------------------------------------------------------------------------------------------------------------|-------------------------------------|---------------------------------------------------------------------------------------------------------------------------------------------------------------------------------------------------------------------------------------------------------------------------------------------------|---------------------------------------------------------------------------------------------------------------------------------------------------------------------------------------------------------------------------------------------------------------------------------|
| Qualitative studies interpreted by Comfort Theory          | 21 | 2018 - 2023: n = 13,<br>1992 - 2017: n = 8.  | Brazil: n = 8,<br>USA: n = 4,<br>Australia: n = 1,<br>Austria: n = 1,<br>China: n = 1,<br>Norway: n = 1,<br>Portugal: n = 1,<br>Sweden: n = 1,<br>Wales: n = 1,<br>Indonesia: n = 1,<br>Ecuador: n = 1. | Hospital: n = 14,<br>Others: n = 7. | Patients and staff members: n = 4,<br>Circulatory system diseases: n = 3,<br>Palliative care: n = 2, Healthy people: n = 2, Pregnancy, childbirth or the puerperium: n = 2, Neoplasms: n =1,<br>Nervous system diseases: n = 1,<br>Elder patients: n =1, Surgical or post-surgical status: n = 1. | Qualitative study: n = 6, Descriptive qualitative study: n = 5, Phenomenological study: n = 3, Reflective qualitative study: n = 2, Case study: n = 2, Explorative qualitative study: n = 1, Collective subject discourse: n = 1. Secondary qualitative analysis: n = 1.        |
| Literature reviews and discussion about Comfort Theory use | 47 | 2018 - 2023: n = 19,<br>1992 - 2017: n = 27. | USA: n = 18,<br>China: n = 11,<br>Portugal: n = 7,<br>Brazil: n = 5,<br>Canada: n = 2,<br>Indonesia: n = 1,<br>Kazakhstan: n = 1,<br>Spain: n = 1,<br>Turkey: n = 1.                                    | N/A                                 | N/A                                                                                                                                                                                                                                                                                               | Literature review: n =23 (which included: integrative review: n = 4, concept analysis: n = 3, systematic review: n = 2, theory derivation method: n = 1, scoping review: n = 1, psychometric review: n = 1.), Literature review and discussion paper: n = 11, Literature review |

| Theory application category                                                                                                                                             | N | Year of publication | Country of origin | Settings | Participants | Design/ methods                                                                                                              |
|-------------------------------------------------------------------------------------------------------------------------------------------------------------------------|---|---------------------|-------------------|----------|--------------|------------------------------------------------------------------------------------------------------------------------------|
|                                                                                                                                                                         |   |                     |                   |          |              | and discussion as a book chapter: n = 6, Reflection: n = 6, Literature review and discussion as a slide presentation: n = 1. |
| CCS: case-controlled study; CSS: cross-sectional study; MMS: mixed methods study; N/A: Not applicable; RCT: randomized controlled trial; USA: United states of America. |   |                     |                   |          |              |                                                                                                                              |
| The sum for column of year was 358 as one document had not this information.                                                                                            |   |                     |                   |          |              |                                                                                                                              |
