# Supplementary material for: Application of Kolcaba’s Comfort Theory in healthcare promoting adults’ comfort: a scoping review
Source: HighWire-hosted journal article supplement (doi:10.1136/bmjopen-2023-077810), 2024-10-01
Supplement: bmjopen-2023-077810supp007_data_supplement.pdf [file bmjopen-2023-077810supp007_data_supplement.pdf]

Supplemental Table S7

Supplemental Table S7-1 Comfort measures reported in papers

| NO. | Comfort measures              | Category |    |     | Total |
|-----|-------------------------------|----------|----|-----|-------|
|     |                               | I        | II | III |       |
| 1   | music therapy                 | 13       | 11 | 7   | 31    |
| 2   | position intervention         | 7        | 7  | 6   | 20    |
| 3   | massage                       | 8        | 5  | 6   | 19    |
| 4   | health education              | 8        | 11 | 0   | 19    |
| 5   | TCM                           | 3        | 13 | 0   | 16    |
| 6   | therapeutic touch             | 6        | 2  | 2   | 10    |
| 7   | cold and hot therapy          | 6        | 3  | 0   | 9     |
| 8   | aromatherapy                  | 5        | 1  | 3   | 9     |
| 9   | guided imagery                | 6        | 2  | 0   | 8     |
| 10  | PMR                           | 2        | 2  | 0   | 4     |
| 11  | exercise                      | 0        | 4  | 0   | 4     |
| 12  | coaching                      | 3        | 0  | 0   | 3     |
| 13  | cognitive strategies          | 2        | 0  | 0   | 2     |
| 14  | positive connotation          | 2        | 0  | 0   | 2     |
| 15  | foot reflexology              | 0        | 2  | 0   | 2     |
| 16  | pet visit                     | 1        | 0  | 0   | 1     |
| 17  | silent therapy                | 1        | 0  | 0   | 1     |
| 18  | mindfulness                   | 1        | 0  | 0   | 1     |
| 19  | still point induction         | 1        | 0  | 0   | 1     |
| 20  | Robusta coffee                | 1        | 0  | 0   | 1     |
| 21  | shower                        | 0        | 1  | 0   | 1     |
| 22  | doll intervention             | 0        | 1  | 0   | 1     |
| 23  | labour dance                  | 0        | 1  | 0   | 1     |
| 24  | paradoxical intention therapy | 0        | 1  | 0   | 1     |
| 25  | art therapy                   | 0        | 1  | 0   | 1     |
| 26  | yoga                          | 0        | 1  | 0   | 1     |

TCM: traditional Chinese medicine; PMR: progressive muscle relaxation

Supplemental Table S7-2 Comfort and related variables measured in papers

| NO. | Variables            | Category |    |     | Total |
|-----|----------------------|----------|----|-----|-------|
|     |                      | I        | II | III |       |
| 1   | comfort              | 40       | 92 | 9   | 141   |
| 2   | pain                 | 10       | 31 | 3   | 44    |
| 3   | satisfaction         | 9        | 19 | 3   | 31    |
| 4   | anxiety              | 8        | 20 | 2   | 30    |
| 5   | depression           | 4        | 6  | 1   | 11    |
| 6   | LoHS                 | 0        | 11 | 0   | 11    |
| 7   | sleep quality        | 3        | 4  | 1   | 8     |
| 8   | QoL                  | 1        | 5  | 1   | 7     |
| 9   | constipation         | 0        | 7  | 0   | 7     |
| 10  | nausea and vomiting  | 0        | 4  | 1   | 5     |
| 11  | loss of appetite     | 0        | 4  | 0   | 4     |
| 12  | stress               | 3        | 0  | 0   | 3     |
| 13  | swelling             | 0        | 3  | 0   | 3     |
| 14  | difficulty urinating | 0        | 3  | 0   | 3     |
| 15  | costs                | 0        | 3  | 0   | 3     |
| 16  | urine leakage        | 2        | 0  | 0   | 2     |
| 17  | well-being           | 1        | 0  | 0   | 1     |
| 18  | delirium             | 0        | 0  | 1   | 1     |

LoHS: length of hospital stay; QoL: quality of life

- Seven categories of theory application:
- Category I: interventions underpinned by Comfort Theory as the theoretical framework
- Category II: interventions evaluated by instruments derived from Comfort Theory
- Category III: descriptive or observational studies of services or practices underpinned by Comfort Theory
- Category IV: surveys using questionnaires derived from Comfort Theory
- Category V: questionnaires development or adaption based on Comfort Theory
- Category VI: qualitative studies interpreted by Comfort Theory
- Category VII: literature reviews and discussion about Comfort Theory use
